# Supplementary material for: In Vitro Fermentation Shows Polyphenol and Fiber Blends Have an Additive Beneficial Effect on Gut Microbiota States
Source: MDPI journal article supplement (doi:10.3390/nu16081159), 2024-04-13
Supplement: s1 [file s1]

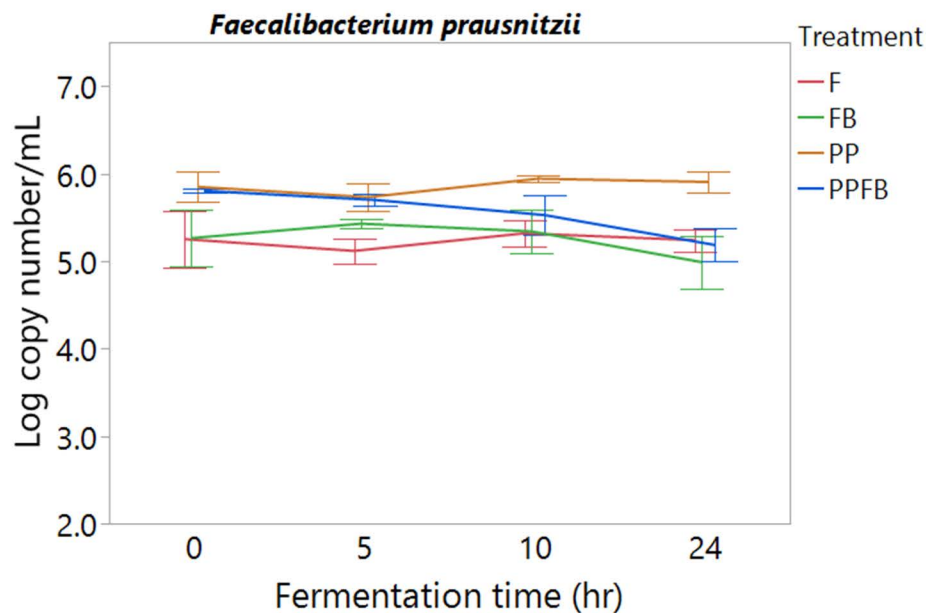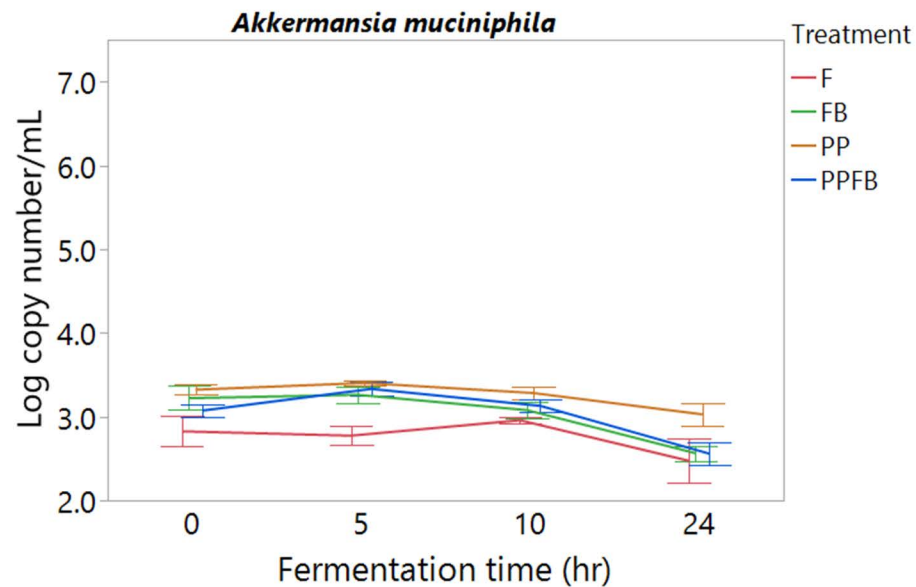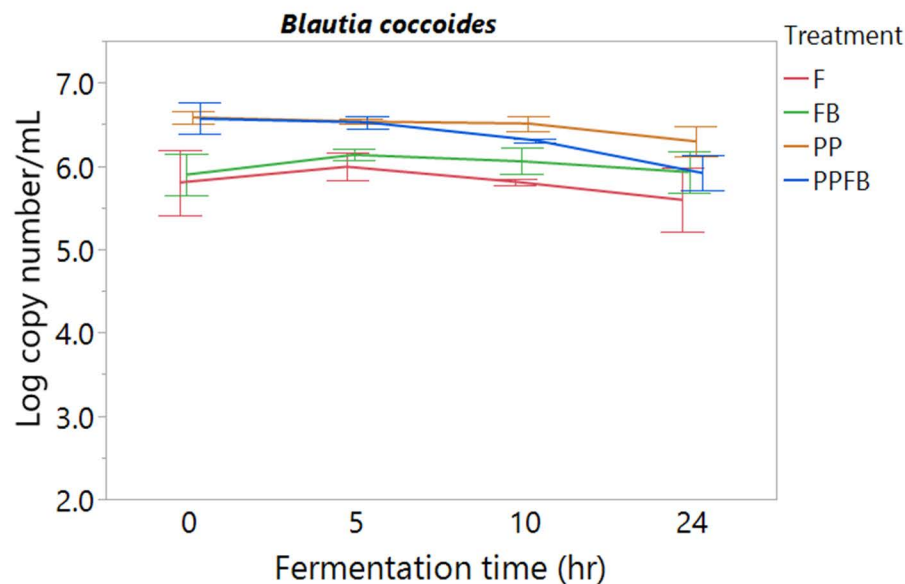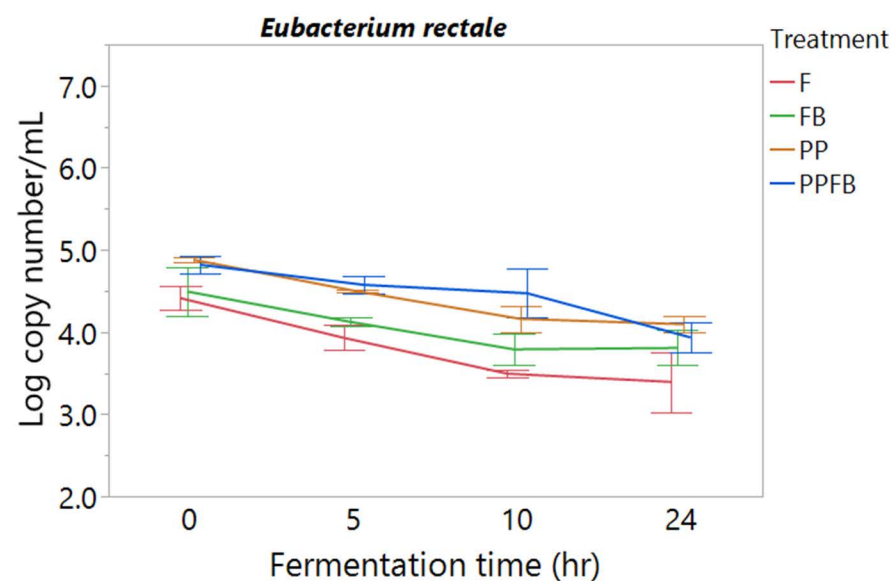

**Figure S1:** Compositional analysis of selected bacterial taxa and abundance changes over time due to supplementation. *Faecalibacterium prausnitzii* (A), *Akkermansia muciniphila* (B), *Blautia coccooides* (C), *Eubacterium rectale* (D). As fermentation residence time increases, differential changes occur within the community, but statistically significant differences were not evident ( $p \geq 0.1$ ). F = non-supplemented; PP= polyphenol blend; FB = fiber blend, PPFB – PP and FB blend. Data are Mean  $\pm$  SEM ( $n = 3$ )

**Table S1.** Constituents in polyphenol and fiber blends and solubilization form

| Constituent              | Active ingredient* | Dry weight | Form                              |
|--------------------------|--------------------|------------|-----------------------------------|
| Polyphenols              |                    |            |                                   |
| Cranberry                | 0.5 g              | 880 mg     | Powder solubilized in methanol    |
| Blueberry                | 0.5 g              | 12600 mg   |                                   |
| Green Tea                | 0.5 g              | 500 mg     |                                   |
| Cocoa                    | 0.5 g              | 1200 mg    |                                   |
| Fiber                    |                    |            |                                   |
| Resistant Starch         | 20 g               | 35.8 g     | Powder in medium suspension (CCM) |
| Galacto-oligosaccharides | 5 g                | 6.5 g      |                                   |
| Inulin                   | 5 g                | 5.5 g      |                                   |

\*Amounts of active ingredients in polyphenol and fiber constituents.  
Recommended daily consumption for normal western habitual diet: 2 g/day polyphenols, 30 g/day fiber

**Table S2.** Bacterial taxa primer sequences for qPCR [17, 26]

| Target                             | Primer      | Sequence                 | Annealing temp (°C) |
|------------------------------------|-------------|--------------------------|---------------------|
| <i>Bifidobacterium spp.</i>        | BIF164f     | GGGTGGTAATGCCGGATG       | 55                  |
|                                    | BIF662r     | CCS=ACCGTTACACCGGGAA     |                     |
| <i>Lactabacillus spp.</i>          | SGLAB 0159f | GGAAACAG(A/G)TGCTAATACCG | 55                  |
|                                    | SGLAB 0667r | CACCGCTACACATGGAG        |                     |
| <i>Ruminococcus bromii</i>         | Bromii F    | CGAACGGAACTGTTTTGAAAGA   | 62                  |
|                                    | Bromii R    | CAAAACCATGTGGTTCCGATAT   |                     |
| <i>Dorea spp.</i>                  | DoreaF      | GCAGCTAACGCAATAAGCAG     | 60                  |
|                                    | DoreaR      | CATTACGAAGCGGTCATCG      |                     |
| <i>Faecalbacterium prausnitzii</i> | Fprau 07    | CCATGAATTGCCTTCAAAACTGTT | 55                  |
|                                    | Fprau02     | GAGCCTCAGCGTCAGTTGGT     |                     |
| <i>Akkermansia muciniphila</i>     | AM1         | CAGCACGTGAAGGTGGGGAC     | 50                  |
|                                    | AM2         | CCTTGCGGTTGGCTTCAGAT     |                     |
| <i>Blautia coccoides</i>           | Ccoc-F      | AAATGACGGTACCTGACTAA     | 50                  |
|                                    | Ccoc-r      | CTTTGAGTTTCATTCTTGCGAA   |                     |
| <i>Eubacterium rectale</i>         | REC-F       | CATTGCTTCTCGGTGCCGTC     | 53.7                |
|                                    | REC-R       | ATTGCTCGGCTTCACAGCT      |                     |

| Table S3. Polyphenol and fiber blend supplementation kinetic influence on the abundance of select bacterial taxa - pairwise comparison by treatment across time |        |               |               |               |
|-----------------------------------------------------------------------------------------------------------------------------------------------------------------|--------|---------------|---------------|---------------|
| <i>Bifidobacterium spp.</i>                                                                                                                                     | 0hr    | 5hr           | 10hr          | 24hr          |
| FB-F                                                                                                                                                            | 0.9998 | <b>0.0265</b> | <b>0.0055</b> | <b>0.0059</b> |
| PP-F                                                                                                                                                            | 0.5369 | <b>0.0016</b> | <b>0.0092</b> | 0.1711        |
| PPFB-F                                                                                                                                                          | 0.8592 | <b>0.0029</b> | <b>0.0040</b> | <b>0.0207</b> |
| PP-FB                                                                                                                                                           | 0.4939 | 0.1844        | 0.9750        | 0.1394        |
| PPFB-FB                                                                                                                                                         | 0.8221 | 0.3708        | 0.9935        | 0.7755        |
| PPFB-PP                                                                                                                                                         | 0.9886 | 0.9459        | 0.9056        | 0.4724        |
| <i>Lactobacillus spp.</i>                                                                                                                                       | 0hr    | 5hr           | 10hr          | 24hr          |
| FB-F                                                                                                                                                            | 0.9281 | 0.8385        | <b>0.0018</b> | <b>0.0003</b> |
| PP-F                                                                                                                                                            | 0.7514 | 0.2523        | <b>0.0222</b> | <b>0.0074</b> |
| PPFB-F                                                                                                                                                          | 0.5347 | <b>0.0315</b> | <b>0.0008</b> | <b>0.0002</b> |
| PP-FB                                                                                                                                                           | 0.9767 | 0.6415        | 0.2535        | 0.0847        |
| PPFB-FB                                                                                                                                                         | 0.8557 | 0.1012        | 0.8756        | 0.9724        |
| PPFB-PP                                                                                                                                                         | 0.9782 | 0.4807        | 0.0910        | <b>0.0464</b> |
| <i>Dorea spp.</i>                                                                                                                                               | 0hr    | 5hr           | 10hr          | 24hr          |
| FB-F                                                                                                                                                            | 0.9992 | 0.6002        | 0.6868        | 0.4630        |
| PP-F                                                                                                                                                            | 0.5332 | 0.0955        | <b>0.0343</b> | <b>0.0053</b> |
| PPFB-F                                                                                                                                                          | 0.3151 | <b>0.0096</b> | <b>0.0174</b> | <b>0.0055</b> |
| PP-FB                                                                                                                                                           | 0.6039 | 0.4976        | 0.1658        | <b>0.0400</b> |
| PPFB-FB                                                                                                                                                         | 0.3686 | 0.0545        | 0.0827        | <b>0.0418</b> |
| PPFB-PP                                                                                                                                                         | 0.9654 | 0.3943        | 0.9575        | 1.0000        |
| <i>Ruminococcus bromii</i>                                                                                                                                      | 0hr    | 5hr           | 10hr          | 24hr          |
| FB-F                                                                                                                                                            | 0.9977 | 0.7381        | <b>0.0013</b> | <b>0.0320</b> |
| PP-F                                                                                                                                                            | 0.0580 | 0.5463        | 0.2300        | 0.8157        |
| PPFB-F                                                                                                                                                          | 0.5297 | 0.3305        | <b>0.0012</b> | <b>0.0347</b> |
| PP-FB                                                                                                                                                           | 0.0749 | 0.9848        | <b>0.0169</b> | 0.1100        |
| PPFB-FB                                                                                                                                                         | 0.6296 | 0.8558        | 0.9998        | 0.9999        |
| PPFB-PP                                                                                                                                                         | 0.3872 | 0.9684        | <b>0.0153</b> | 0.1195        |

F = non-supplemented; PP = polyphenol blend; FB = fiber blend; PPFB = polyphenol and fiber blend. Bold represents significant differences across treatment groups (p≤0.05).

**Table S4.** Differences in total short-chain fatty acid (SCFA) concentrations due to polyphenol and fiber blend supplementation - pairwise comparison by treatment across time

| Treatment | Time (hr) | Total SCFA (mM) | P-value<br>Difference to F* | P-value<br>Difference to PPFB** | Ac:Pp:Bu Ratio |
|-----------|-----------|-----------------|-----------------------------|---------------------------------|----------------|
| PPFB      | 0         | 0.79            | 0.801                       | --                              | 51:29:20       |
|           | 5         | 3.59            | 0.981                       | --                              | 67:25:08       |
|           | 10        | 11.77           | 0.013*                      | --                              | 74:14:12       |
|           | 24        | 20.18           | 0.007*                      | --                              | 57:17:26       |
| PP        | 0         | 0.89            | 0.972                       | 0.567                           | 54:28:18       |
|           | 5         | 4.11            | 0.427                       | 0.626                           | 71:21:08       |
|           | 10        | 9.75            | 0.244                       | 0.213                           | 59:17:24       |
|           | 24        | 14.93           | 0.136                       | 0.126                           | 60:16:24       |
| FB        | 0         | 0.83            | 0.984                       | 0.941                           | 54:28:18       |
|           | 5         | 3.27            | 0.972                       | 0.851                           | 68:24:08       |
|           | 10        | 11.54           | 0.018*                      | 0.995                           | 80:12:08       |
|           | 24        | 19.13           | 0.0157*                     | 0.847                           | 53:18:29       |

F = non-supplemented; PP = polyphenol blend; FB = fiber blend; PPFB = polyphenol and fiber blend. Ratio of acetic acid, propionic acid, and butyric acid (Ac:Pp:Bu) in samples. \*Significant differences across treatment compared to F at the same time point (p≤0.05); \*\*Significant differences across treatment compared to PPFB at the same time point (p≤0.05). Mean±SEM values (n = 3)

**Table S5.** Mean short-chain fatty acid (SCFA) concentrations due to polyphenol and fiber blend supplementation

| Treatment | Time (hr) | Acetic Acid  | Propionic Acid | Isobutyric Acid | Butyric Acid | Isovaleric Acid | Valeric Acid |
|-----------|-----------|--------------|----------------|-----------------|--------------|-----------------|--------------|
| PPFB      | 0         | 0.40 ± 0.08  | 0.23 ± 0.01    | 0.01 ± 0.00     | 0.16 ± 0.01  | 0.02 ± 0.00     | 0.02 ± 0.00  |
|           | 5         | 2.41 ± 0.54  | 0.88 ± 0.11    | 0.02 ± 0.00     | 0.30 ± 0.05  | 0.03 ± 0.00     | 0.03 ± 0.00  |
|           | 10        | 8.72 ± 1.21  | 1.64 ± 0.37    | 0.01 ± 0.00     | 1.41 ± 0.62  | 0.03 ± 0.00     | 0.03 ± 0.01  |
|           | 24        | 11.54 ± 2.75 | 3.36 ± 0.76    | 0.06 ± 0.05     | 5.29 ± 2.14  | 0.21 ± 0.17     | 0.60 ± 0.47  |
| PP        | 0         | 0.48 ± 0.08  | 0.25 ± 0.03    | 0.01 ± 0.00     | 0.16 ± 0.02  | 0.02 ± 0.00     | 0.02 ± 0.00  |
|           | 5         | 2.91 ± 0.30  | 0.88 ± 0.08    | 0.02 ± 0.00     | 0.32 ± 0.03  | 0.03 ± 0.00     | 0.02 ± 0.00  |
|           | 10        | 5.77 ± 0.33  | 1.67 ± 0.06    | 0.02 ± 0.00     | 2.31 ± 0.24  | 0.04 ± 0.00     | 0.06 ± 0.01  |
|           | 24        | 8.89 ± 0.34  | 2.37 ± 0.89    | 0.19 ± 0.03     | 3.67 ± 1.26  | 0.58 ± 0.10     | 1.32 ± 0.21  |
| FB        | 0         | 0.45 ± 0.06  | 0.23 ± 0.02    | 0.01 ± 0.00     | 0.15 ± 0.01  | 0.02 ± 0.00     | 0.02 ± 0.00  |
|           | 5         | 2.21 ± 0.07  | 0.79 ± 0.04    | 0.02 ± 0.00     | 0.27 ± 0.02  | 0.03 ± 0.00     | 0.02 ± 0.00  |
|           | 10        | 9.22 ± 2.13  | 1.40 ± 0.15    | 0.02 ± 0.00     | 0.92 ± 0.34  | 0.03 ± 0.00     | 0.03 ± 0.00  |
|           | 24        | 10.22 ± 3.22 | 3.34 ± 0.90    | 0.05 ± 0.04     | 5.57 ± 3.03  | 0.22 ± 0.18     | 0.63 ± 0.51  |
| F         | 0         | 0.45 ± 0.02  | 0.24 ± 0.01    | 0.01 ± 0.00     | 0.16 ± 0.00  | 0.02 ± 0.00     | 0.02 ± 0.00  |
|           | 5         | 2.33 ± 0.45  | 0.84 ± 0.13    | 0.02 ± 0.00     | 0.26 ± 0.07  | 0.03 ± 0.00     | 0.02 ± 0.00  |
|           | 10        | 5.18 ± 0.60  | 1.60 ± 0.25    | 0.02 ± 0.00     | 1.03 ± 0.19  | 0.04 ± 0.00     | 0.05 ± 0.01  |
|           | 24        | 6.97 ± 2.59  | 2.11 ± 1.33    | 0.16 ± 0.14     | 2.62 ± 1.48  | 0.44 ± 0.29     | 1.33 ± 1.18  |

F = non-supplemented PP= polyphenol blend; FB = fiber blend; PPFB = polyphenol and fiber blend. All values: Mean(mM)±SEM (n = 3)

**Table S6.** Mean concentrations of select microbial metabolites due to polyphenol and fiber blend supplementation

| Treatment | Time (hr) | Indole (uM)±SEM | Ammonia (mM)±SEM | FRAP (mM)±SEM |
|-----------|-----------|-----------------|------------------|---------------|
| PPFB      | 0         | 37.50 ± 6.68    | 6.24 ± 6.71      | 8.047 ± 0.549 |
|           | 5         | 29.31 ± 10.19   | 7.89 ± 6.92      | 8.788 ± 0.322 |
|           | 10        | 17.64 ± 0.55    | 9.07 ± 7.57      | 8.075 ± 0.34  |
|           | 24        | -4.93 ± 1.31    | 4.27 ± 3.27      | 5.642 ± 0.328 |
| PP        | 0         | 53.34 ± 9.6     | 5.72 ± 6.94      | 7.642 ± 0.659 |
|           | 5         | 34.13 ± 4.56    | 6.88 ± 9.85      | 8.596 ± 0.74  |
|           | 10        | 29.83 ± 1.43    | 9.95 ± 11.11     | 8.279 ± 0.343 |
|           | 24        | 29.58 ± 0.36    | 9.48 ± 1.62      | 5.626 ± 0.163 |
| FB        | 0         | 55.53 ± 1.48    | 5.68 ± 6.46      | 3.995 ± 0.184 |
|           | 5         | 32.79 ± 6.29    | 7.54 ± 8.98      | 4.436 ± 0.487 |
|           | 10        | 18.22 ± 6.85    | 8.93 ± 10.23     | 4.593 ± 0.386 |
|           | 24        | 7.14 ± 3.52     | 6.74 ± 2.14      | 2.799 ± 0.502 |
| F         | 0         | 31.37 ± 6.31    | 9.26 ± 7.93      | 3.925 ± 0.204 |
|           | 5         | 31.37 ± 6.31    | 11.41 ± 9.67     | 4.163 ± 0.26  |
|           | 10        | 22.60 ± 3.43    | 9.34 ± 5.10      | 4.486 ± 0.305 |
|           | 24        | 46.39 ± 0.71    | 21.02 ± 2.17     | 3.275 ± 0.136 |

F = non-supplemented, PP = polyphenol blend; FB = fiber blend; PPFB = polyphenol and fiber blend. Values represent Mean±SEM (n = 3)

**Table S7.** Select metabolite pairwise comparison across time by treatment due to polyphenol and fiber blend supplementation

| Treatment | Time 1 (hr) | Time 2 (hr) | Indole p-value | Ammonia p-value | FRAP p-value |
|-----------|-------------|-------------|----------------|-----------------|--------------|
| PPFB      | 0           | 5           | 0.337          | 0.14            | 0.337        |
|           | 0           | 10          | 0.182          | 0.948           | 1.000        |
|           | 0           | 24          | <b>0.0004*</b> | 1.000           | 0.193        |
|           | 5           | 10          | 1.000          | 1.000           | 0.66         |
|           | 5           | 24          | <b>0.036*</b>  | 1.000           | 0.078        |
|           | 10          | 24          | 0.178          | 1.000           | <b>0.043</b> |
| PP        | 0           | 5           | 0.133          | 1.000           | 0.738        |
|           | 0           | 10          | 0.227          | 1.000           | 1.000        |
|           | 0           | 24          | 0.281          | 1.000           | 0.305        |
|           | 5           | 10          | 0.84           | 0.864           | 1.000        |
|           | 5           | 24          | 1.000          | 1.000           | 0.147        |
|           | 10          | 24          | 1.000          | 1.000           | <b>0.012</b> |
| FB        | 0           | 5           | 0.221          | 1.000           | 1.000        |
|           | 0           | 10          | 0.097          | 1.000           | 0.586        |
|           | 0           | 24          | <b>0.021*</b>  | 1.000           | 0.175        |
|           | 5           | 10          | <b>0.003*</b>  | 1.000           | 1.000        |
|           | 5           | 24          | <b>0.023*</b>  | 1.000           | 0.245        |
|           | 10          | 24          | 0.172          | 1.000           | 0.263        |
| F         | 0           | 5           | 1.000          | 1.000           | 1.000        |
|           | 0           | 10          | 1.000          | 1.000           | 1.000        |
|           | 0           | 24          | 0.328          | 0.738           | <b>0.042</b> |
|           | 5           | 10          | 1.000          | 1.000           | 0.362        |
|           | 5           | 24          | 0.328          | 1.000           | 0.362        |
|           | 10          | 24          | <b>0.022*</b>  | 0.405           | 0.232        |

F = non-supplemented; PP = polyphenol blend; FB = fiber blend; PPFB = polyphenol and fiber blend. \*Significant differences across time within each treatment (p<0.05).
